# Supplementary material
Source: PubMed Central journal article supplement (PMC10704342)
Supplement: jamapsychiatry-e235138-s001.pdf [file jamapsychiatry-e235138-s001.pdf]

# INTERVENTIONAL RESEARCH PROTOCOL

**Title of Project:** Mindfulness Oriented Recovery Enhancement (MORE) as an Adjunct to Methadone Treatment for Chronic Pain and Opioid Relapse Prevention

**Principal Investigator:**

Name: Nina Cooperman  
RWJ-Department of Psychiatry, Division of Addiction Psychiatry  
Contact Information: [cooperna@rwjms.rutgers.edu](mailto:cooperna@rwjms.rutgers.edu); 732-235-4341

**PROTOCOL VERSION AND DATE: Version 15, 2/2/2022**

**Revision History:**

| Version Date | Summary of Revisions Made:                                                                                                                                                                                                                                                                                 |
|--------------|------------------------------------------------------------------------------------------------------------------------------------------------------------------------------------------------------------------------------------------------------------------------------------------------------------|
| 12/19/19     | First Version                                                                                                                                                                                                                                                                                              |
| 7/24/20      | -Changed study procedures from in-person to remote due to COVID<br>-Added Columbia Suicide Severity Rating Scale, Brief Trauma Questionnaire, Brief Savoring Inventory<br>-Frequency of DSMB meeting changed from every 3 months to every 6 months<br>-Eligibility criteria and screening procedure edited |
| 9/18/20      | -Included in-patient visits at clinic, if and when feasible.<br>-Added the option of providing electronically signed informed consent using the HIPAA compatible survey platform, RedCap or Qualtrics.                                                                                                     |
| 12/24/20     | - Updated eligibility criteria: Any subject that participated in formal mindfulness training within the past 5 years is not eligible for study.                                                                                                                                                            |
| 3/31/2021    | - Added to protocol: Only individuals meeting all of the inclusion criteria at baseline will be able to participate in the study. Subjects must be on methadone during baseline.                                                                                                                           |
| 6/3/2021     | - EMA changed from 2x daily to 3x daily.<br>- COVID questions and e-cigarette use questions during baseline, 8wk, and 16wk.                                                                                                                                                                                |
| 8/24/2021    | -Information on tablets provided edited and clients will be provided with a tablet guide.                                                                                                                                                                                                                  |
| 11/8/2021    | -Cohort size modified from 8 to 16 participants to 10 to 18 participants<br>-Added: If participant is not able to be reached by phone/email or in-person at clinic, follow-up letter will be mailed.                                                                                                       |
| 12/9/2021    | - Added: If extended time occurs between baseline completion and group start (study intervention), clients will be asked to do another baseline survey and will be provided an additional \$30 gift card.                                                                                                  |
| 2/2/2022     | - Increased potential study enrollment from up to 170 to up to 184.                                                                                                                                                                                                                                        |

## Table of Contents

Skip To Section: Hold **CTRL** + Click (Below) To Follow Link in **Blue**

|            |                                                                                       |
|------------|---------------------------------------------------------------------------------------|
| <b>1.0</b> | <b><a href="#">Research Introduction</a></b>                                          |
| 1.1        | <a href="#">Purpose/Specific Aims</a>                                                 |
| 1.2        | <a href="#">Research Significance</a>                                                 |
| 1.3        | <a href="#">Research Design and Methods</a>                                           |
| 1.4        | <a href="#">Preliminary Data</a>                                                      |
| 1.5        | <a href="#">Sample Size Justification</a>                                             |
| 1.6        | <a href="#">Study Variables</a>                                                       |
| 1.7        | <a href="#">Drugs/Devices/Biologics</a>                                               |
| 1.8        | <a href="#">Primary Specimen Collection</a>                                           |
| 1.9        | <a href="#">Interviews, Focus Groups, or Surveys</a>                                  |
| 1.10       | <a href="#">Timetable/Schedule of Events</a>                                          |
| <b>2.0</b> | <b><a href="#">Project Management</a></b>                                             |
| 2.1        | <a href="#">Research Staff and Qualifications</a>                                     |
| 2.2        | <a href="#">Resources Available</a>                                                   |
| 2.3        | <a href="#">Research Sites</a>                                                        |
| <b>3.0</b> | <b><a href="#">Multi-Site Research Communication &amp; Coordination</a></b>           |
| 3.1        | <a href="#">Outside Research</a>                                                      |
| <b>4.0</b> | <b><a href="#">Research Data Source/s</a></b>                                         |
| 4.1        | <a href="#">Primary Data – Subjects and Specimens</a>                                 |
| 4.2        | <a href="#">Subject Selection and Enrollment Considerations</a>                       |
| 4.3        | <a href="#">Subject Randomization</a>                                                 |
| 4.4        | <a href="#">Secondary Subjects</a>                                                    |
| 4.5        | <a href="#">Number of Subjects</a>                                                    |
| 4.6        | <a href="#">Consent Procedures</a>                                                    |
| 4.7        | <a href="#">Special Consent Populations</a>                                           |
| 4.8        | <a href="#">Economic Burden and/or Compensation For Subjects</a>                      |
| 4.9        | <a href="#">Risks to Subjects</a>                                                     |
| 4.10       | <a href="#">Secondary Data – Record/Chart Reviews, Databases, Tissue Banks, Etc.</a>  |
| 4.11       | <a href="#">Chart/Record Review Selection</a>                                         |
| 4.12       | <a href="#">Secondary Specimen Collection</a>                                         |
| <b>5.0</b> | <b><a href="#">Special Considerations</a></b>                                         |
| 5.1        | <a href="#">Health Insurance Portability and Accountability Act (HIPAA)</a>           |
| 5.2        | <a href="#">Family Educational Rights and Privacy Act (FERPA)</a>                     |
| 5.3        | <a href="#">NJ Access to Medical Research Act</a>                                     |
| 5.4        | <a href="#">Code of Federal Regulations Title 45 Part 46 (Vulnerable Populations)</a> |
| <b>6.0</b> | <b><a href="#">Research Data Protection and Reporting</a></b>                         |
| 6.1        | <a href="#">Data Management and Confidentiality</a>                                   |
| 6.2        | <a href="#">Data Security</a>                                                         |
| 6.3        | <a href="#">Data Safety And Monitoring</a>                                            |
| 6.4        | <a href="#">Reporting Results</a>                                                     |
| 6.5        | <a href="#">Data Sharing</a>                                                          |
| <b>7.0</b> | <b><a href="#">Data and/or Specimen Banking</a></b>                                   |
| <b>8.0</b> | <b><a href="#">Other Approvals/Authorizations</a></b>                                 |
| <b>9.0</b> | <b><a href="#">Bibliography</a></b>                                                   |

## 1.0 Research Introduction

### 1.1 Purpose/Specific Aims

This study aims to evaluate the impact of a novel intervention, Mindfulness Oriented Recovery Enhancement (MORE), on drug use, treatment retention, methadone adherence, pain, depression, and anxiety among individuals receiving methadone maintenance treatment (MT). The main goal of this study is to conduct a clinical trial to assess MORE, delivered by telehealth, through secure video or phone conferencing, with respect to a range of clinical outcomes. This study will involve a 2-arm individually randomized controlled trial design that compares MORE and methadone treatment as usual (TAU).

#### A. Objectives

Aim 1. Determine MORE's efficacy for decreasing risk of relapse and MT drop-out relative to TAU.

Aim 2. Determine MORE's efficacy for impacting secondary outcomes (e.g., days of drug use, methadone adherence, pain, depression, and anxiety) relative to TAU.

#### B. Hypotheses / Research Question(s)

As compared to the TAU group, the MORE group will 1) have a lower risk of relapse and treatment dropout (primary outcomes) and 2) have less drug use, greater methadone adherence, and greater reductions in pain symptoms, depression, and anxiety (secondary outcomes).

### 1.2 Research Significance (*Briefly describe the following in 500 words or less*):

Despite the proven effectiveness of medication-assisted treatment (MAT) on opioid-use disorder (OUD), approximately 50% of people who begin MT discontinue within 12 months,<sup>1</sup> and 50% of people retained in MT have an opioid relapse within six months.<sup>2</sup> Research suggests that chronic physical pain, affecting 55%-61% of people receiving MT,<sup>3</sup> could be contributing to drug relapse and MT adherence.<sup>4,5</sup> Unfortunately, effective pain management in MT patients is challenging, as practitioners are reluctant to prescribe opioid pain medications to those with a history of substance use disorder. Therefore, alternative interventions are critical to help people in treatment for OUD to cope with their pain and improve their quality of life.

Mindfulness Oriented Recovery Enhancement (MORE) is a novel intervention that addresses drug use and chronic pain, and is unique among current OUD interventions in that it helps break negative reinforcement cycles by modifying the associative learning mechanisms that process drug and non-drug related cues.<sup>5,6</sup> As a result, MORE promotes biobehavioral changes that strengthen responses to natural rewards while reducing responses to drug rewards, making the intervention more effective in helping people in MT manage their pain and maintain long-term drug abstinence.<sup>5,6</sup> MORE, which integrates training in mindfulness, cognitive reappraisal skills, savoring of natural rewards and positive emotion regulation into an 8-week group therapy, is designed to target the attentional biases, affective dysregulation, and autonomic stress responses that underlie the feedback loop between chronic pain, craving, and opioid misuse.<sup>6,7</sup> While MORE has shown positive outcomes in pain patients misusing, or at risk of misusing, opioids, it has not yet been tested in OUD patients with pain who are in recovery or receiving MAT. Therefore, we propose to test this promising intervention among individuals with pain who are receiving MT for an OUD.

70 This study is significant because it could provide an additional and, as compared to existing behavioral  
71 interventions, a potentially more effective option for preventing relapse and managing chronic pain in people  
72 receiving MAT. Specifically, if found to be effective, MORE could help people on MAT cope with the stress and  
73 dysfunction associated with pain, reduce their risk of relapse, and enhance their overall quality of life.

74

## 75 **1.2 Research Design and Methods**

76

77 This study is a 2-arm individually randomized controlled trial design in which outcomes of MT patients randomized  
78 to MORE, delivered remotely, by secure phone or video conferencing, are compared to outcomes of those  
79 randomized to methadone treatment as usual (TAU). In the study we will randomize MT patients with chronic pain  
80 to MORE or TAU. This study phase will conduct a clinical trial to assess MORE efficacy and to explore factors  
81 impacting the efficacy of MORE on various outcomes. Participants with pain who are receiving MT for an opioid  
82 use disorder (OUD) will be recruited from the New Brunswick Counseling Center (NBCC), Burlington  
83 Comprehensive Counseling, the Lennard Clinic, and Jersey Shore Addiction Services (JSAS).

84

### 85 **A. Procedures**

86

87 Participants will be recruited through flyers posted in the clinics, being approached by research assistants in the  
88 waiting room of their usual methadone clinic (New Brunswick Counseling Center, Burlington Comprehensive  
89 Counseling, Jersey Shore Addiction Services, or Lennard Clinic), if and when feasible, and referral by clinic staff.  
90 When a potential participant is referred by clinic staff, that means that the individual will be told about the study  
91 by staff and that it is up to the potential subject to volunteer by contacting the research staff on site or by  
92 phone. Alternatively, clinic staff will get permission from potentially eligible and interested individuals for the clinic  
93 to provide contact information to study staff for study staff to reach out to them for study recruitment by phone or  
94 in-person at their clinic or another safe and private location in the community (e.g., library, park, or coffee shop), if  
95 feasible. The number of individuals who contact the study staff through the flyers or referral and who are  
96 approached by study staff in the clinics will be tracked. Number of individuals who refuse study participation and  
97 who consent to the study will also be tracked. Patients expressing interest in the research will be given detailed  
98 study information by the RA and initial screening for study eligibility will be conducted over the phone or in-person  
99 at their clinic. Once a patient is screened as likely eligible, the RA will email or standard mail an informed consent  
100 form or an electronic link to access the consent form to the individual. Alternatively, the patient can pick up a copy  
101 of the consent at their respective clinic. Also, clinic staff will hand out consents to potentially eligible and  
102 interested individuals. Once the individual has a copy of the informed consent, the research assistant will review  
103 the informed consent and further assess eligibility over the phone or by secure, HIPAA compliant, video meeting or  
104 in-person. Participants will be asked to sign the electronic consent form on Qualtrics or REDCap, mail a signed  
105 paper version back to the research assistant, or drop off a signed paper version to their clinic for research staff to  
106 pick up. Alternatively, consenting maybe be done in-person. Participants will also keep a copy of the consent for  
107 their records.

108

109 Participants randomized to the MORE condition will participate in eight, weekly, two-hour online group sessions  
110 led by a clinic or study counselor. Each session will contain 7 participants and will be conducted online through  
111 secure video or phone conferencing. If a participant is unable to join the MORE session through video conference  
112 due to technical difficulties at the time of the session, the participant will be instructed to join the session by  
113 phone or the participant may go to their clinic and a research or clinic staff member can help them access the  
114 intervention through their tablet or a computer. Attendance at each session and reasons for missing sessions will  
115 be recorded. Participants randomized to the control condition will continue receiving treatment as usual at their  
116 clinic.

117

118 All study participants will partake in a total of three interviews lasting up to 120 minutes occurring at baseline, 8-,  
119 and 16-weeks (week 1 will be considered the week of the first MORE group session) by video or phone  
120 conferencing or in-person. If more than 3 months since baseline survey was administered from start of group  
121 (study intervention), clients will be asked to do another baseline survey. Each participant will also have a urine or  
122 saliva sample collected during each assessment. This is required to verify self-report of drug use. Due to social  
123 desirability, it is common for people to not accurately report drug use; therefore, biochemical verification is the  
124 gold standard measure of drug use. Participants will be mailed a urine or saliva test prior to the interview.  
125 Alternatively, the patient can pick up urine or saliva test at their respective clinic. At the time of the interview,  
126 participants will be instructed on how to administer the test and will be instructed to show the research assistant  
127 the results on the video conference. The research assistant will then record the results. If a participant is unable or  
128 unwilling to attend a video meeting, a research assistant will conduct a telephone or in-person interview. If the  
129 interview is conducted by telephone, the participant will self-report their drug test results, and the fact that it was  
130 self-reported will be noted. Alternatively, when feasible, drug screen will be done in-person at their clinic. When  
131 drug tests cannot be completed, the reasons will be noted. Results from the most recent drug tests administered  
132 by the participants' clinics will also be obtained with participant consent.

133 All attempts to reach participants to schedule 8 and 16 week follow-up assessments will be tracked. If participant is  
134 not able to be reached by phone/email or in-person at clinic, follow-up letter for respective week will be mailed.  
135 Participants will also complete cognitive testing (for approx. 30-45 minutes) at baseline and 8-weeks and ecological  
136 momentary assessments (EMA) conducted during the entire study period via their own smartphone or computer,  
137 or tablet, which will be provided to each participant by study staff. Tablets from T-Mobile will be ordered on an as  
138 needed basis and based on t-mobiles availability. EMA participation will require the participant to respond to 3x-  
139 daily prompts in which they will be asked a series of brief questions regarding their current mood and exposure to  
140 opioid triggers. Additionally, subjects will be asked to initiate responses when they experience serious craving or  
141 relapse to opioid use. Each EMA assessment will last approximately 3-5 minutes. For those who do not complete  
142 their EMA, our research staff will do a timeline follow-back over the phone, video conferencing, or in-person to  
143 collect missing drug use data. Weekly EMA completion reports will be reviewed and a phone or in-person TLFB  
144 completed, as needed.

#### 145 146 **B. Data Points**

147  
148 All study participants will participate in three video, phone conferencing, or in-person visits at baseline, 8-, and 16-  
149 weeks. Information will be collected on demographic characteristics, substance use, methadone treatment,  
150 physical pain, mental health, physical health, and intervention implementation and attitudes. Urine and/or saliva  
151 samples will be requested at each assessment for confirmation of self-reported drug use or recent drug test results  
152 will be obtained from the participants' clinic chart. In addition, participants will partake in daily ecological  
153 momentary assessments (EMA) throughout the 16-weeks of study participation that include brief measures of pain  
154 intensity, mood, and substance use. Participants will also be asked to initiate communication via smartphone,  
155 computer, or tablet when they use drugs. Self-initiated responses will include information about the  
156 circumstances surrounding their lapse. A synopsis of all study instruments are included below (see 1.9B – Study  
157 instruments).

#### 158 159 **C. Study Duration and Participation Time**

160  
161 This study is expected to take two years. Each subject will participate in the study for a total of 16-weeks.

162

163 **D. Primary And Secondary Endpoints**

- 164 • Primary Outcomes: risk of relapse and treatment drop-out  
165 • Secondary Outcomes: days of drug use, methadone adherence, pain, depression, anxiety  
166

167 **1.3 Preliminary Data**  
168

169 Effects of MORE on cognitive, affective, and psychophysiological mechanisms implicated in addiction.

170 Dr. Garland conducted the first pilot randomized controlled trial (RCT; N=53) of MORE, and found that, relative to a  
171 support group (SG) control, MORE significantly decreased stress, modified addiction attentional bias, and increased  
172 heart rate variability recovery from substance cues during an affect-modulated cue-reactivity protocol. Two follow-  
173 up studies (N=58) found that trait mindfulness among substance dependent individuals in treatment was  
174 negatively associated with addiction attentional bias and positively associated with heart rate variability recovery  
175 from stress-primed cue-exposure.<sup>8,9</sup>  
176

177 MORE as a treatment for opioid misuse and chronic pain – preliminary outcomes and processes.

178 Dr. Garland recently completed a pilot RCT of 8 sessions of MORE for chronic pain patients receiving long-term  
179 opioid analgesic therapy.<sup>7</sup> In the course of 1.5 years, 304 patients were recruited from community sources, 115 of  
180 whom met study criteria and were randomly assigned to treatment. Eighty-one percent of participants who began  
181 the study treatments completed treatment and were retained at the post-treatment assessment. Intent-to-treat  
182 analyses indicate that compared with a support group (SG; n=58) control, MORE (n=57) led to significant  
183 reductions in pain severity ( $p=.014$ ,  $d=.63$ ) and functional interference ( $p=.002$ ;  $d=.84$ ) that were maintained at 3-  
184 month follow-up and mediated by non-reactivity and reinterpretation of pain as innocuous sensory signals.  
185 Importantly, MORE improved addiction-related outcomes. Relative to SG, a greater proportion of opioid misusers  
186 treated with MORE no longer exceeded the validated threshold for opioid misuse following treatment, due to  
187 reductions in aberrant drug-related behavior,  $X^2=3.74$ ,  $p=.05$ . MORE also significantly reduced opioid craving by  
188 post-treatment ( $p=.027$ ,  $d=.50$ ), and significantly decreased the correlation strength between craving and misuse.<sup>7</sup>  
189

190 MORE and ecological momentary assessment of pain and affect.

191 In a sample of low SES individuals with OUD and comorbid psychiatric disorders, MORE (n=20) led to significantly  
192 greater reductions in opioid craving ( $p=.04$ ,  $d=.63$ ) and PTSD symptoms ( $p=.001$ ,  $d=.84$ ) compared to Cognitive  
193 Behavioral Therapy (CBT).<sup>10</sup> In this trial, across 8 weeks of treatment, patients completed up to 224 EMA measures  
194 of pain and affect. Multilevel models and generalized estimating equations examined effects of treatment on  
195 momentary pain and positive affect, and generalized linear models examined associations between pain and affect  
196 and changes in opioid misuse by post-treatment. Patients in MORE reported significantly greater improvements in  
197 momentary pain ( $p=.01$ ) and positive affect ( $p=.004$ ) than patients in the SG. Further, over the entire course of  
198 treatment, patients in MORE were significantly more likely to exhibit positive affect regulation (OR=2.75) than  
199 patients in the SG. Finally, improvements in positive affect (but not pain) over the course of intervention were  
200 associated with reduced risk of misusing opioids by post-treatment ( $p=.02$ ).<sup>10</sup>  
201

202 **1.5 Sample Size Justification**

203 With 1.5 years of subject accrual and an additional follow-up of 16 weeks after the accrual interval, our study  
204 needs 47 subjects per group to test a hazard ratio of 0.55 when comparing MORE to TAU, with 80% power and  
205 alpha=5% (two-sided). To account for attrition, we will recruit up to 92 subjects per group (up to 184 subjects at a  
206 1:1 ratio for MORE vs. TAU).  
207  
208  
209

210 **1.6 Study Variables**

211

212 **A. Independent Variables, Interventions, or Predictor Variables**

213

214 Mindfulness-Oriented Recovery Enhancement (MORE) structure (Intervention Condition). The MORE arm will  
215 participate in eight, weekly, two-hour group sessions led by a therapist on video or phone conference. MORE  
216 sessions involve mindfulness training to prevent opioid relapse and reduce pain, cognitive reappraisal to decrease  
217 negative affect and regulate opioid craving, and savoring to augment natural reward processing and evoke positive  
218 emotion.<sup>6</sup> Each session begins with a mindful breathing or body scan meditation, followed by a debriefing session,  
219 in which the therapist provides reinforcement and troubleshooting to help guide successful implementation of  
220 mindfulness techniques. Following this debrief of the in-session mindfulness meditation, the therapist debriefs  
221 participants’ homework practice of using mindfulness, reappraisal, and savoring skills to cope with pain and  
222 enhance well-being in everyday life. During this debrief of the homework practice, the therapist provides  
223 reinforcement and troubleshooting to help guide successful implementation of mindfulness, reappraisal, and  
224 savoring techniques. Next, new psychoeducational material is introduced according to the session topics outlined  
225 in Table 1. Sessions culminate with an experiential exercise, and close with a brief mindful breathing meditation.  
226 Participants are asked to practice 15 minutes of mindfulness/reappraisal/savoring skills each day (i.e. homework  
227 practice).  
228

| Table 1. MORE session content |                                                                                                                                                                                                   |
|-------------------------------|---------------------------------------------------------------------------------------------------------------------------------------------------------------------------------------------------|
| Week                          | Theme                                                                                                                                                                                             |
| 1                             | Introduction to mindfulness, and the relationship between nociception, pain and emotional suffering; mindful breathing and body scan                                                              |
| 2                             | Automatic pain coping habits; awareness of automatic opioid use; instruction in mindfulness of automatic pilot; mindful breathing                                                                 |
| 3                             | Mindful reappraisal as means of coping with negative emotions; mindful breathing                                                                                                                  |
| 4                             | Savoring natural rewards; positive emotion regulation; mindful savoring practice                                                                                                                  |
| 5                             | Mindfulness of opioid craving; contemplation of negative consequences of opioid use; imaginal opioid cue-exposure; mindful breathing                                                              |
| 6                             | The relationship of the stress response to pain and craving; imaginal stress exposure; mindful breathing; body scan                                                                               |
| 7                             | Concepts of thought suppression, aversion, and attachment; exercise in the futility of thought suppression; mindful breathing and acceptance                                                      |
| 8                             | Discussion of how to maintain mindfulness practice; finding a sense of meaning and purpose of life; development of mindful recovery plan; imaginal rehearsal of skill learning; mindful breathing |

229

230 Treatment as Usual (TAU). In the MT programs, clients typically come to the clinic regularly (usually 6 days per  
231 week at the beginning of treatment) to get their methadone dose; during periods of social distancing or as clients  
232 progress through the program and remain abstinent from drugs, they can “take home doses” that they can take on  
233 days that they are not required to come to the clinic. Timing of the initiation of take-home doses and the  
234 scheduling of clinic days varies across clinics. Clients see their clinic substance abuse counselor for individual  
235 counseling, usually weekly at the beginning of treatment, with decreasing frequency if they remain abstinent and  
236 progress through treatment. Depending on clients’ stage of MT and success with remaining abstinent from drugs,  
237 they may be required to attend clinic treatment groups. During periods of social distancing, these individual or  
238 group sessions may be remote, through video conference or phone. Also, some clients may choose to go to  
239 voluntary counseling, educational, or support groups (none of these groups involve coping with pain oriented or  
240 are mindfulness-based). All individual treatment characteristics, including methadone dosage, take-home dosing,  
241 clinic attendance and attendance at clinic counseling sessions and groups (whether in-person or remotely), will be  
242 documented for all study participants and entered as covariates in the analyses.

243

244

245

246 **B. Dependent Variables or Outcome Measures**

247

248 In addition, the study will explore outcomes among participants in the MORE condition relative to treatment as  
249 usual (TAU) in regard to outcomes such as:

- 250 • Risk of relapse and treatment drop out (primary outcome)
- 251 • Methadone adherence
- 252 • Days of drug use
- 253 • Depression
- 254 • Anxiety
- 255 • Pain

256

257 **1.7 Drugs/Devices/Biologics**

258

- 259 ▪ N/A

260

261 **1.8 Primary Specimen Collection**

262

263 **A. Types of specimens to be collected, where, and by whom**

264

265 We will utilize a urine or saliva screen that tests for methadone (to measure MT adherence) and additional  
266 substances (e.g., benzodiazepines, barbiturates, cocaine, marijuana, methamphetamine, morphine, oxycodone,  
267 phencyclidine and amphetamine etc.). These specimens will be collected at baseline and each follow-up time point  
268 (8- and 16-weeks). Biochemical verification of self-report of drug use is the gold standard measurement of drug  
269 use and, without biochemical verification, self-reported drug use as an outcome variable will be questioned by the  
270 scientific community. Participants will be mailed a urine or saliva test prior to the interview. Alternatively, the  
271 patient can pick up urine or saliva test at their respective clinic. If feasible, drug screen may be done in-person. At  
272 the time of the interview, participants will be instructed on how to administer the test and will be instructed to  
273 show the research assistant the results on the video conference. The research assistant will then record the  
274 results. If participants are unable or unwilling to attend a video research appointment, a research assistant will  
275 conduct an interview over the phone and participant will self-report the drug screen results. The fact that drug  
276 screen results are self-reported will be noted. Alternatively, if feasible, the drug screen may be done in-person. All  
277 results (positive or negative) will be recorded in the research database that will only be identified with participant's  
278 study ID and not the participant's name. Drug test results will not be shared with anyone, including the  
279 participant's clinic, without written consent from the participant. With participant consent, the results of the most  
280 recent drug tests conducted by the patients' clinics will be obtained from the patients' charts.

281

282 **B. Transporting specimens**

283

284 The sample will be collected by the participant and results read by research staff at the time of sample collection.  
285 The sample will be disposed as soon as results are read (typically within 10 minutes of sample collection) and  
286 recorded. The sample will not be transported.

287

288 **C. Specimen Processing**

289

290 Participants will be mailed a urine or saliva test prior to the interview. Alternatively, the patient can pick up urine  
291 or saliva test at their respective clinic. At the time of the interview, participants will be instructed on how to  
292 administer the test and will be instructed to show the research assistant the results on the video conference. The  
293 research assistant will then record the results. If participants are unable or unwilling to attend a video research



294 appointment, a research assistant will conduct an interview over the phone and participant will self-report the  
295 drug screen results. Alternatively a drug screen can be done in-person. In this case, the participant will collect the  
296 specimen and the research staff will read the results directly, in person.

297

#### 298 **D. How long will specimens will be kept**

299

300 The sample will be disposed of immediately after results are read and recorded.

301

#### 302 **E. How specimens will be destroyed upon study completion**

303

304 Samples will be flushed down the toilet (urine test) or disposed of in the trash (saliva test).

305

### 306 **1.9 Interviews, Focus Groups, or Surveys**

307

#### 308 **A. Administration**

309

##### 310 **▪ Timing and Frequency**

311

312 Research staff will collect interview data and drug screens from both intervention and control group subjects  
313 through video, phone interview, or in-person using standardized measures conducted at baseline and 8- and 16-  
314 weeks. If the research assessments are conducted over the phone, drug screen results will be recorded as self-  
315 reported or obtained from clinic charts. Additionally, subjects will engage in three times daily EMA assessments of  
316 approximately 3-5 minutes each for 16-weeks. For 16-weeks, subjects will also initiate EMA communications to  
317 report relapses, which will also last for under 5 minutes. EMA completion reports will be reviewed, weekly, and  
318 participants will be contacted, as needed, to support EMA completion.

319

##### 320 **▪ Location**

321

322 The assessments and drug screens will take place via video/online, phone interview, at their clinic, or at another  
323 safe and private location in the community (e.g., library, park, or coffee shop).

324

##### 325 **▪ Procedures for Audio and Visual Recording**

326

327 Audio or video recordings will be made of the MORE therapy sessions. All recordings will be stored in password  
328 protected computers, in a locked office at 317 George St., New Brunswick, NJ, or in password protected files, on  
329 the Rutgers network or HIPAA compliant Box file.

330

#### 331 **B. Study Instruments**

332

- 333 • Relapse, assessed through ecological momentary assessment data.
- 334 • Treatment drop-out, assessed by clinic report.
- 335 • Methadone dosing adherence, assessed through drug screen.
- 336 • Total days of drug use, assessed through EMA, Addiction Severity Index, and drug screen.
- 337 • Trajectories of depression and anxiety, assessed with the Beck Anxiety Inventory and the Centers for  
338 Epidemiological Studies Depression Scale.
- 339 • Pain, assessed with EMA and the Brief Pain Inventory.

340

341 Ecological Momentary Assessment (EMA) data collection (ongoing from baseline to 16 weeks). The EMA and  
342 other survey data will be programmed as a REDCap or Qualtrics survey delivered over a password-protected smart  
343 phone, computer, or tablet that will not store any data. REDCap and Qualtrics are secure, HIPPA-compliant, web-  
344 based application for building and managing online surveys and databases. The EMA survey approach will involve  
345 1) collecting event-contingent records of drug use when they occur as well as 2) regular random assessments,  
346 prompted by random text messages initiated by Twilio, 3x daily via smartphones. For event-contingent records,  
347 participants will be asked to initiate an entry when a relapse occurs and note how they were feeling. Random  
348 assessment probe will be scheduled for early in the day, the afternoon, and the evening. The random probes will  
349 be generated by an algorithm in REDCap or Qualtrics and linked to a Twilio phone number. For random  
350 assessments, participants will be asked to note how they are feeling, drug use, and whether they completed their  
351 homework (if in the intervention group). Research staff will demonstrate to study participants how to use the  
352 phones/tablets, respond to the prompts, and provide event contingent data. Research staff will provide  
353 instructions about how to use the phone/tablet and practice using the phone/tablet with participants until they  
354 are capable of using it.

355 Data will be received by the REDCAP or Qualtrics system. Data access between the REDCap and Qualtrics  
356 databases and the web servers are encrypted and restricted to a monitored port. All REDCap and Qualtrics data,  
357 which is displayed or captured by the user interface, is encrypted for security. Within REDCap and Qualtrics all  
358 data transactions including inserts, updates, deletions, import/export and reporting are logged. The EMA system  
359 in this study deployed via REDCap and Qualtrics will reside in a HIPAA compliant protected space. The REDCap and  
360 Qualtrics production and development servers use encrypted drives. Physical hardware will be secured in a locked  
361 facility.

362 The data will only be accessible to study investigators and staff. The data will be processed by an already  
363 developed REDCap or Qualtrics program that formats the data as a "long file" with one row per time point per  
364 individual participant. The investigators will employ linear mixed models to test the effects of MORE vs. the control  
365 condition on substance use, pain, and other study variables. The treatment X time interaction will be the main  
366 fixed effect of interest. Models will include a random intercept, as well as a random slope if warranted by model fit  
367 statistics. Auto-correlation between repeated measures will be modeled as a first-order autoregressive function.  
368 We will also compute within-group linear mixed models examining mindfulness practice duration as a predictor of  
369 clinical outcomes. EMA completion reports will be reviewed, weekly, and, as needed.

370 *Substance use history (Baseline)*. We will use the questions from the Addiction Severity Index to gather self-report  
371 information on lifetime use of opiates, alcohol, tobacco and substances, and past-30 day use of all substances.

372 *Current substance use (Baseline, 8- and 16-- weeks)*. We will utilize a urine or saliva screen that tests for  
373 methadone (to provide corroboration of MT adherence) and additional substances (e.g., benzodiazepines,  
374 barbiturates, cocaine, marijuana, methamphetamine, morphine, oxycodone, phencyclidine and amphetamine).  
375 Participants will also be asked about overall number of days of use in the past 30 with questions based on the  
376 Addiction Severity Index. Drug test results conducted by the clinic during the study period will be obtained from  
377 participants' clinic charts. We will combine self-reports of drug use with biochemical measures because it is the  
378 gold standard, and without biochemical verification, self-reported drug use as an outcome variable will be  
379 questioned by the scientific community. If a biochemical measure is negative, but the participant reports drug use,  
380 the participant will be coded as using drugs since the biochemical measure will only capture a specific time point.  
381 However, if the participant self-reports drug abstinence, but the biochemical measure is positive for drug use (the  
382 more likely scenario) the participant will be coded as having used drugs.

383 *Pain (Baseline, 8- and 16-- weeks)*. At baseline and both follow-up points, pain severity will be measured with the  
384 the Brief Pain Inventory<sup>7</sup> (BPI;  $\alpha = .87$ ) a well-validated measure that has been widely used to tap acute and chronic  
385 pain. Participants will be asked to report their worst pain during the past week, least pain during the past week,

386 average pain, and current pain. Response options range from 0 (no pain) to 10 (pain as bad as I can imagine). An  
 387 overall pain severity score will be computed by taking the mean of the four items. Pain will also be assessed with  
 388 the Sensations Body Map.

389 *Cognitive impairment, psychosis, suicidality (screening).* If cognitive functioning, current psychosis, and suicidality is  
 390 questionable based on information provided by clinic staff, patient history, or research staff observation, to  
 391 determine study eligibility, cognitive impairment will be assessed with the Mini Mental Status Exam (MMSE),<sup>8</sup>  
 392 psychosis will be assessed with the Structured Clinical Interview for DSM-V (SCID) Psychotic screen,<sup>9</sup> and suicidality  
 393 will be assessed with the Columbia Suicide Severity Rating Scale (C-SSRS). The Mini-Mental Status Exam, MMSE is  
 394 a widely used valid and reliable measure of cognitive functioning that assesses orientation to time and place,  
 395 registration, attention and calculation, recall, language, Scores <24 indicate cognitive impairment. The SCID  
 396 Psychotic Screen is a semi-structured clinical interview that assesses symptoms of psychotic disorders (e.g.,  
 397 delusions, hallucinations) based on the DSM-V criteria. The C-SSRS is a five-item reliably and valid measure that  
 398 assesses suicidal ideation, plans, and intent.

399 *Mental health history (Baseline), trauma (baseline, 8-weeks, and 16-weeks) and psychiatric symptoms and*  
 400 *treatment (baseline, 8 weeks, 16 weeks).* At baseline, history of mental illness and psychiatric treatment will be  
 401 assessed. At each subsequent research visit, participants will be asked if they took any psychotropic medications or  
 402 received any mental health counseling since their last visit. Trauma history will be assessed with the Brief Trauma  
 403 Questionnaire (BTQ).<sup>10,11</sup> The BTQ is a 10-item self-report questionnaire that assesses traumatic experiences. At  
 404 each research visit, symptoms of depression and anxiety will be evaluated with the Center for Epidemiologic  
 405 Depression Scale and the Beck Anxiety Inventory.<sup>12</sup>

406 *Physical health history (Baseline) and symptoms (Baseline, 8- and 16-- weeks) and medication (Baseline, 8- and 16-*  
 407 *- weeks).* At Baseline, history of illness such as HIV, cancer, heart disease, emphysema, asthma and other chronic  
 408 conditions will be assessed. Daily health functioning will be evaluated at every research visit with the RAND 36-  
 409 Item Health Survey 1.0 (SF-36).<sup>13</sup> The reliability and validity of this self-report scale that measures overall health  
 410 and ability to complete daily activities has been shown. Current pain and other medication (prescribed and over  
 411 the counter) will be assessed at each research visit.

412  
 413 MT dose and MT services. This information will be abstracted from participants' clinic charts, with participants'  
 414 consent.

415  
 416 *Intervention implementation (Week 8).* Number of sessions completed and missed will be assessed for each  
 417 participant in both conditions. Reasons provided for missed sessions will also be recorded.

418 **1.10 Timetable/Schedule of Events**

419

| Table 1. Timeline                      | Year 1 |   |   |   | Year 2 |   |   |   |
|----------------------------------------|--------|---|---|---|--------|---|---|---|
|                                        | 1      | 2 | 3 | 4 | 1      | 2 | 3 | 4 |
| Protocol finalizing and staff training |        |   |   |   |        |   |   |   |
| Recruitment                            |        |   |   |   |        |   |   |   |
| Intervention period                    |        |   |   |   |        |   |   |   |
| Follow-up data collection              |        |   |   |   |        |   |   |   |
| Data analyses, manuscript preparation  |        |   |   |   |        |   |   |   |

420

421

422

423  
424  
425  
426  
427  
428  
429  
430  
431  
432  
433  
434  
435  
436  
437  
438  
439  
440  
441  
442  
443  
444  
445  
446  
447  
448  
449  
450  
451  
452  
453  
454  
455  
456  
457  
458  
459  
460  
461  
462  
463  
464  
465  
466  
467  
468  
469

## 2.0 Project Management

### 2.1 Research Staff and Qualifications

Dr. Nina Cooperman, the Principal Investigator on this project, is a clinical psychologist and faculty member at Rutgers-RWJ Department of Psychiatry. Dr. Cooperman has more than 20 years' of clinical and research experience with substance abusing and mentally ill populations.

All research staff will have a minimum of a Bachelor's degree or experience working with substance users. All investigators and key personnel will have undergone mandatory education in human research participant protection, including completing the Human Research Curriculum of Collaborative Institutional Training (CITI), "HIPAA Security" training, and "HIPAA Privacy" training. Research staff will participate in ongoing team meetings with the study investigators to discuss any issues that arise.

### 2.2 Resources Available

#### Facilities

Rutgers Robert Wood Johnson Medical School, Addiction Psychiatry Research Offices at 317 George Street, Suite 105, New Brunswick, NJ 08901. The Division of Addiction Psychiatry is located in a clinical-research unit of 3000 sq. ft. which includes faculty and staff offices, sound proofing, and a conference room (where community advisory panel meeting will be held). In addition to several faculty members, Division office space is shared by administrative personnel, research assistants, and secretaries. Fax and copy machines are available in the Division offices.

New Brunswick Counseling Center (NBCC) at 320 Suydam St., New Brunswick, NJ 08901. Dr. Cooperman has conducted several research studies at NBCC, and the clinic is extremely enthusiastic about being a research site for this project (see attached letter). The New Brunswick Counseling Center (NBCC) provides comprehensive, evidence-based, individualized, substance abuse treatment services. NBCC's staff includes a multidisciplinary team of medical, psychological, social work, and substance abuse professionals. NBCC currently approximately 500 patients receiving methadone maintenance treatment, and, in the past year, almost 90% of admissions to the center reported current cigarette smoking. The clinic is in central New Brunswick, NJ, within walking distance from where the Division of Addiction Psychiatry offices are located, making this location ideal for patient recruitment and collaboration. Office and group counseling space is available at the NBCC for the research staff to see study participants, if necessary.

Burlington Comprehensive Counseling (under the same leadership as NBCC) 75 Washington Street, Mount Holly, NJ 08060. Burlington Comprehensive Counseling provides comprehensive, evidence-based, integrated mental health and substance abuse treatment services. Services are individualized and provided in an outpatient setting for prevention, early intervention, and treatment of people with mental health, substance use and/or co-occurring disorders. Program provides access to substance abuse and mental health services addressing the bio-psycho-social consequences associated with substance use and dependence.

The Lennard Clinic. The Lennard Clinic, with two offices in Newark and Elizabeth, New Jersey (61 Frelinghuysen Ave, Newark, NJ 07114 and 850 Woodruff Lane Elizabeth, NJ 07201), exists to enrich the quality of life of opioid dependent adults in Essex, Union and surrounding counties to reduce illicit drug use, decrease criminal activities, enhance health conditions and promote social/economic stabilities by providing superior treatment services. The Lennard Clinic provides: 1) medication Assisted Treatment (methadone, suboxone), 2) individual treatment,

470 transition and discharge planning, 3) individual and group counseling, medical care for indigent clients, case  
471 management, and clinic based treatment on demand (CBTOD) free for eligible clients. The Newark site services  
472 approximately 700 clients on methadone maintenance treatment and the Elizabeth site serves approximately 300  
473 clients on methadone maintenance treatment.

474  
475 Jersey Shore Addiction Services (JSAS) Healthcare, Inc. JSAS HealthCare, Inc. is a private, non-profit agency that  
476 provides comprehensive outpatient substance abuse treatment. Additional services provided to patients include:  
477 perinatal and neonatal services; HIV counseling and testing, HIV Early Intervention and medical treatment, and  
478 case management. JSAS HealthCare, Inc. currently occupies 12,400 square feet of professional space in Neptune,  
479 New Jersey. They have a total census of approximately 700 patients in their methadone maintenance treatment  
480 program, and enroll approximately 500 patients per year. Group counseling and office space is available at JSAS for  
481 MORE intervention groups and research interviews, if necessary. JSAS receives State Targeted Response funds to  
482 expand their medication assisted treatment (MAT) services.

#### 483 484 **Medical or Psychological Resources**

485 Methadone clinic medical and psychological resources will be available to study participants. During assessment  
486 sessions, participants will be told that they do not need to discuss topics or disclose any information that makes  
487 them uncomfortable. The research assistant will be trained to deal with any distress related to the study  
488 interviews. Referrals for counseling or psychiatric evaluation will be made if necessary. If a participant expresses  
489 thoughts of harming himself or herself or others or discloses a child is at-risk, either verbally or on the study  
490 measures, a written protocol has been developed and confidentiality may be broken. A participant who endorses  
491 current thoughts of harming himself, herself, or others will be assessed by the methadone program clinical team to  
492 determine if the participant is safe to leave the clinic, if the individual is in the clinic or by Dr. Cooperman, if  
493 contact with the participant was over the phone, to determine if further action needs to be taken to ensure the  
494 safety of the participant or others. Dr. Williams will be available to assess and address any medical adverse events  
495 that occur during the course of the study.

#### 496 497 **Research Staff Training-**

498 All research staff will have completed the online human subject's protection (CITI training). Staff will be trained  
499 and supervised by Dr. Cooperman on unbiased recruiting of study participants, data collection, and maintaining  
500 confidentiality. They will also be trained on assessing adverse events, tracking study participants, data entry, and  
501 procedures if a participant expresses intent to harm him/herself or others. Procedure guides (e.g., interview  
502 checklists) will be created for research staff and weekly research staff meetings will be held to assure protocol  
503 adherence and address any issues.

#### 504 505 **2.3 Research Sites**

506  
507 Research will be conducted at Rutgers-RWJ Medical School, Department of Psychiatry, Division of Addiction  
508 Psychiatry at 317 George St, Suite 105, New Brunswick NJ 08901, and the University of Utah, 201 Presidents Cir,  
509 Salt Lake City, UT 84112 (for data analyses only). In addition, subjects will be recruited from the New Brunswick  
510 Counseling Center (NBCC), 320 Suydam St., New Brunswick, NJ 08901, NBCC 2<sup>nd</sup> site Burlington Comprehensive  
511 Counseling, 75 Washington St, Mt. Holly, NJ 08060, the Lennard Clinic, 61 Frelinghuysen Ave, Newark, NJ 07114  
512 and 850 Woodruff Lane Elizabeth, NJ 07201, and Jersey Shore Addiction Services, 685 Neptune Blvd, Neptune City,  
513 NJ 07753.

#### 514 515 **3.0 Multi-Site Research Communication & Coordination**

516  
517 N/A

518  
519  
520  
521  
522  
523  
524  
525  
526  
527  
528  
529  
530  
531  
532  
533  
534  
535  
536  
537  
538  
539  
540  
541  
542  
543  
544  
545  
546  
547  
548  
549  
550  
551  
552  
553  
554  
555  
556  
557  
558  
559  
560  
561  
562  
563  
564  
565

## 4.0 Research Data Source/s

### 4.1 Primary Data-Subjects and Specimens

Up to 184 patients at the New Brunswick Counseling Center (NBCC), Burlington Comprehensive Counseling, the Lennard Clinic, Jersey Shore Addiction Services (JSAS).

### 4.2 Subject Selection and Enrollment Considerations

#### A. Recruitment Details

Up to 184 participants will be recruited from the New Brunswick Counseling Center (NBCC), Burlington Comprehensive Counseling, the Lennard Clinic, Jersey Shore Addiction Services (JSAS). MT clinic staff will be asked to refer appropriate patients to the study. Clinic patients who are interested and potentially eligible for the study will be provided with the study phone number to reach the research staff. Alternatively, clinic staff will get permission from potentially eligible and interested individuals for the clinic to provide contact information to study staff for study staff to reach out to them for study recruitment by phone. Clinic staff will be informed of the eligibility criteria for the study and will be asked to not refer patients that they know are actively suicidal or psychotic. Also, flyers will be posted in dosing areas and the waiting rooms of all participating clinics. Research assistants (RAs) may recruit patients in clinic waiting areas, if and when feasible. Patients expressing interest in the research will be given detailed study information by the RA and initial screening for study eligibility will be conducted over the phone, through video conference, or in-person.

#### B. Source of Subjects

Participants will be recruited from the New Brunswick Counseling Center (NBCC), Burlington Comprehensive Counseling, the Lennard Clinic, and Jersey Shore Addiction Services.

#### C. Method to Identify Potential Subjects

Clinic staff will be informed of the eligibility criteria for the study and will be asked to not refer patients that they know are actively suicidal or psychotic. Patients expressing interest in the research will be given detailed study information by the RA and initial screening for study eligibility will be conducted over the phone, through video conference, or in-person. Also, flyers will be posted in dosing areas and the waiting rooms of all participating clinics.

#### E. Subject Screening

An initial eligibility screen will be conducted over the phone. Based on the initial screening, if further screening measures are needed, they will be done after the patient consent.

##### ▪ Inclusion Criteria

Only individuals meeting all of the inclusion criteria at baseline will be able to participate in the study. Subjects must be age 18 or older, English-speaking, currently on methadone, and have been experiencing non-malignant pain with an intensity level  $\geq 3$  out of 10 on the BPI average pain severity item for 3 months or longer.

566  
567  
568  
569  
570  
571  
572  
573  
574  
575  
576  
577  
578  
579  
580  
581  
582  
583  
584  
585  
586  
587  
588  
589  
590  
591  
592  
593  
594  
595  
596  
597  
598  
599  
600  
601  
602  
603  
604  
605  
606  
607  
608  
609  
610  
611  
612  
613

▪ **Exclusion Criteria**

Subjects will be excluded from participation if they do not meet the inclusion criteria above, exhibit cognitive impairment (based on observation, history, clinician feedback, or score <24 on the Mini Mental Status Exam<sup>19</sup>) or psychosis (based on observation, history, clinician feedback, or positive SCID Psychotic Screen<sup>20</sup>), are at suicidal risk (based on observation, history, clinician feedback, or positive score on C-SSRS), unable to attend group sessions for any reason, or participated in formal mindfulness training within the past 5 years.

**F. Recruitment Materials**

Flyers with study information and a phone number to reach research staff will be posted throughout the New Brunswick Counseling Center (NBCC), Burlington Comprehensive Counseling, JSAS, and the Lennard Clinic.

**F. Lead Site Recruitment Methods**

N/A

**4.3 Subject Randomization**

Since MORE is a closed group, we will randomize cohorts of 14 participants to TAU or MORE. Once we recruit 14 at a particular clinic, we will randomize participants to MORE or TAU, and the MORE group will begin. Randomization will be stratified by gender and any opioid use in the past 30 days.

**4.4 Secondary Subjects**

N/A

**4.5 Number of Subjects**

**A. Total Number of Subjects**

Total number of subjects to be accrued is up to 184.

**B. Total Number of Subjects If Multicenter Study**

N/A

**C. Require Number of Subjects to Complete Research**

N/A

**G. Feasibility of Recruiting**

NBCC serves approximately 500 MT clients per year, the Lennard Clinic serves approximately 1000 MT clients at two sites, and JSAS serves about 700. Based on the prior research studies conducted at these clinics and the high amount of clients served, there are no anticipated problems in recruiting ample subjects. Additional sites will be added to the study if necessary if recruitment targets are not being met.

614  
615  
616 **4.6 Consent Procedures**  
617  
618 **A. Consent**  
619  
620 **▪ Documenting Consent**  
621  
622 Consent for Study Participation  
623  
624 **▪ Waiver of Documentation Of Consent**  
625  
626 N/A  
627  
628 **▪ Waiver or Alteration of Consent Process**  
629  
630 **(i) Waiver or Alteration Details**  
631  
632 N/A  
633  
634 **(ii) Destruction of Identifiers**  
635  
636 N/A  
637  
638 **(iii) Use of Deception/Concealment**  
639  
640 N/A  
641  
642 **B. Consent Process**  
643  
644 **▪ Location of Consent Process**  
645  
646 Once a patient is screened as likely eligible, the RA will email or standard mail an informed consent form or send  
647 an electronic link to access the consent form to the individual. Alternatively, the patient can pick up a copy of the  
648 consent at their respective clinic. Once the individual has a copy of the informed consent, the research assistant  
649 will review the informed consent and further assess eligibility over the phone, by secure, HIPAA compliant, video  
650 meeting, or in-person. Along with the informed study consent, the participant will be asked to sign two releases of  
651 information--one for the clinic to release information to the RWJMS study team and one for the RWJMS study  
652 team to release information relevant to their care at the clinic.

653 **▪ Ongoing Consent**  
654  
655 N/A  
656  
657 **▪ Individual Roles for Researchers Involved in Consent**  
658  
659 Study recruiters/research assistants, who have been trained in the study protocol and the process for obtaining  
660 consent, will consent subjects for the study.



661  
662  
663  
664  
665  
666  
667  
668  
669  
670  
671  
672  
673  
674  
675  
676  
677  
678  
679  
680  
681  
682  
683  
684  
685  
686  
687  
688  
689  
690  
691  
692  
693  
694  
695  
696  
697  
698  
699  
700  
701  
702  
703  
704  
705  
706  
707  
708

▪ **Coercion or Undue Influence**

Those who choose to participate will complete a written, informed consent process before any study procedures are performed. Participants will be asked to sign the consent form and mail it back to the research assistant to be kept filed or sign electronically through Qualtrics or REDCap. Alternatively, the patient can drop their consent at their respective clinic. Participants will also keep a copy of the consent for their records. Research staff will read the consent form out loud to any individuals who are unable to read the consent form on their own. Topics covered in the consent form will include a description of study procedures, the time involved, the right to withdraw at any time without penalty, procedures used to protect participant anonymity, information on the use of data, the potential benefits and risks of participating in the study, and limits of confidentiality regarding expressions of suicidal ideation, homicidal ideation, or a child at risk. Research staff will be trained to note signs that suggest that the individual is unable to consent and will: 1) ask permission from the individual before questioning him/her; 2) observe for signs of illness, intoxication, and other reasons causing individuals to be unable to consent; 3) assess orientation to person, place, time, and situation; and, 4) ask the potential participant to paraphrase the study requirements.

**4.7 Special Consent/Populations**

**A. Minors-Subjects Who Are Not yet Adults**

▪ **Criteria for Consent of Minors**

N/A

▪ **Wards of the State**

**1. Research in NJ Involving Minors**

N/A

**2. Research Outside of NJ Involving Minors**

N/A

▪ **Parental Permission**

N/A

▪ **Non-Parental Permission**

N/A

▪ **Assent Process**

N/A

709     ▪     **Non-English Speaking Subjects**

710  
711     N/A

712  
713     **B. Adults Unable to Consent / Cognitively Impaired Adults (*for interventional studies*)**

714  
715     N/A

716  
717     **4.8 Economic Burden and/or Compensation for Subjects**

718  
719     **A. Expenses**

720  
721     Subjects will not incur any costs other than their time for participating in the study.

722  
723     **B. Compensation/Incentives**

724  
725     Participants will receive a \$30 gift card for completing the baseline assessments and drug screen, \$40 for the 8-  
726     week assessments and drug screen, and \$50 for the 16-week assessment and drug screen. At each of the baseline  
727     and 8-week assessments, participants will also receive a \$20 gift card for completing the cognitive assessments. If  
728     more than 3 months since baseline survey was administered from start of group (study intervention), clients will  
729     be asked to do another baseline survey and will be provided an additional \$30 gift card. Also, participants will  
730     receive approximately 25¢ for completing each of 3x daily EMA assessments (e.g., \$20 for 10-25%, \$30 for 26-50%,  
731     \$40 for completing 51-85%, and \$50 for completing 86-100% of EMA assessments). Payments will be made in the  
732     form of a gift card. Participants randomized to the intervention condition will receive a \$5 gift card for attending  
733     each online intervention session (up to \$40 total). These amounts are deemed fair compensation for the amount  
734     of time participants are asked to spend, without being large enough to be considered coercive. Gift cards will be  
735     standard mailed or emailed to participants.

736  
737     **C. Compensation Documentation**

738  
739     All participant incentive payments will be fully documented on incentive logs, which will record the date, amount,  
740     subject ID number, and name of the research staff distributing the payment for each incentive paid. Participants  
741     will also be asked to initial the log entry indicating that they have received their payment. If an incentive is sent via  
742     mail, a copy of the envelope with patient address on it, the mail tracking number, and photocopy of the gift card  
743     sent will be kept in the patient file.

744  
745     **4.9 Risks to Subjects**

746  
747     **A. Description of Subject Risk**

748  
749     This study involves accepted forms of treatment and assessment. Risks to subjects are minimal. The main risk  
750     associated with the study is discomfort related to talking about personal issues in study assessments and group  
751     sessions. However, participants do not have to talk about anything they do not want to. Loss of confidentiality is a  
752     risk. However, group participants will be informed about the importance of confidentiality and study staff will be  
753     trained to protect participant confidentiality. While we are not actively recruiting participants with an existing  
754     psychological disorder, it is possible we enroll individuals who we subsequently find to be suicidal or have other  
755     mental health problems. Personal information may be disclosed to a participant's clinic counselor, program  
756     director, or other public safety of healthcare personnel if study staff believes, based upon information reported

757 during intervention sessions or through research assessments, that a participant may harm himself or herself or  
758 others. Protocols have been developed to manage unexpected emergencies involving individuals with mental  
759 health problems, as well as to manage risks associated with participant discomfort and loss of confidentiality. If the  
760 study staff determine that the participant is a harm to him/herself or others to the extent that, based on the  
761 implementation of the protocol, it is a new or worsening symptom, it will be considered an adverse event. If the  
762 research staff determines that loss of confidentiality is required to protect the individual or others, the event will  
763 be reported to the IRB and NIH as a serious adverse event.

764

#### 765 **B. Procedures for Risks to Embryo, Fetus, and/or Pregnant Subjects**

766

767 N/A

768

#### 769 **C. Risks to Non-Subjects**

770

771 N/A

772

#### 773 **D. Assessment of Social Behavior Considerations**

774

##### 775 **▪ Reasonably Foreseeable Risks**

776

777 A risk associated with this study is discomfort related to talking about personal or sensitive issues in study  
778 assessments and group sessions. However, participants do not have to talk about anything they do not want to.  
779 Loss of confidentiality, in general or about sensitive information like substance use, is a risk. While we are not  
780 actively recruiting participants with an existing psychological disorder, it is possible we enroll individuals who we  
781 subsequently find to be suicidal or have other mental health problems. Personal information may be disclosed to a  
782 participant's clinic counselor, program director, or other public safety of healthcare personnel if study staff  
783 believes, based upon information reported during intervention sessions or through research assessments, that a  
784 participant may harm himself or herself or others. Protocols have been developed to manage unexpected  
785 emergencies involving individuals with mental health problems, as well as to manage risks associated with  
786 participant discomfort.

787

##### 788 **▪ Risk Of Imposing an Intervention on Subject with Existing Condition.**

789

790 All interventions will be voluntary, and participants can discontinue at any time.

791

##### 792 **▪ Other Foreseeable Risks**

793

794 N/A

795

##### 796 **▪ Observation And Sensitive Information**

797

798 N/A

799

#### 800 **E. Minimizing Risks**

801

802 During assessment sessions, participants will be told that they do not need to discuss topics or disclose any  
803 information that makes them uncomfortable. The study clinicians and research assistant will be trained to deal  
804 with any distress related to the study assessments or group sessions. Referrals for additional counseling or

805 psychiatric evaluation will be made if necessary. If a client expresses thoughts of harming himself or herself or  
806 others either verbally or on the study measures, a written protocol has been developed and confidentiality may be  
807 broken. Participants will be made aware during the consent process that confidentiality may be broken if the study  
808 staff determine that he or she may be a risk to him or herself or others. A participant who endorses current  
809 thoughts of harming himself, herself, or others will be assessed by study clinical staff and, if necessary, the  
810 participant's substance abuse counselor and/or the clinical director of the clinic (through a video conference,  
811 phone meeting, or in-person) to determine if the participant is safe or if further action needs to be taken to ensure  
812 the safety of the participant or others. If a participant discloses information about harming him or herself or others  
813 during a telephone or video interaction, Dr. Cooperman or Dr. Williams will be available by phone or in-person to  
814 contact the participant for assessment or help the research staff assess the participant and determine appropriate  
815 course of action. Written protocols have been established for these circumstances.

816  
817 Group participants will be informed about the importance of confidentiality and study staff will be trained to  
818 protect participant confidentiality. Data will be collected in private areas to prevent disclosure of information. Also,  
819 to assure confidentiality, data and recordings will be secured in a database management system, password  
820 protected files, and in secure file cabinets. Data collection forms, databases and recording will not include  
821 identifiers other than a study ID code. The key to the code will be kept separately in a locked or password  
822 protected file. Informed consent forms will be kept separated in a locked file in the same office. Three levels of  
823 security are provided to prevent unauthorized persons from accessing data: password protection, computer or file  
824 cabinet locks, and a locked office. In addition, we have a Certificate of Confidentiality from the National Institutes  
825 of Health that protects study data from forced disclosure.

#### 826 827 **F. Certificate of Confidentiality**

828  
829 Since all NIH studies are automatically issued a Certificate of Confidentiality (COC), the study is already covered by  
830 a COC. As of October 1, 2017, NIH funded researchers will no longer have to request a CoC, nor will they receive an  
831 actual certificate. The CoC will be issued automatically to NIH funded grants, cooperative agreements, contracts  
832 and intramural research projects research funded wholly or in part by the NIH that collects or uses identifiable,  
833 sensitive information.

#### 834 835 **G. Potential Benefits to Subjects**

836  
837 Participants in the MORE study group will receive the benefit of free online group therapy sessions. Further,  
838 participants who do not use illicit drugs or are better able to manage their chronic pain as a result of this study will  
839 gain important health and quality of life benefits. Because the risk of receiving free group treatment is very small,  
840 and the potential benefits for individual participants and society are quite large, the risk/benefit ratio is clearly  
841 weighted on the side of the benefit for those randomized to the intervention condition. Further, if MORE is  
842 ultimately found to be effective, in the future, it could help improve quality of life and prevent relapse for all  
843 individuals with chronic pain and in methadone treatment, including all of the participants. However, this study  
844 could also have no direct benefit to study participants.

#### 845 846 **H. Provisions to Protect the Privacy Interests of Subjects**

847  
848 Group participants will be informed about the importance of confidentiality and study staff will be trained to  
849 protect participant confidentiality. Data will be collected in private areas or a HIPAA compliant video/phone  
850 meeting to prevent disclosure of information. Also, to assure confidentiality, data and recordings will be secured in  
851 a database management system, password protected files, and in secure file cabinets. Data collection forms,  
852 databases and recording will not include identifiers other than a study ID code. The key to the code will be kept

853 separately in a locked file. Informed consent forms will be kept separated in a locked file in the same office. Three  
854 levels of security are provided to prevent unauthorized persons from accessing data: password protection,  
855 computer or file cabinet locks, and a locked office. Transmission of EMA data will be encrypted and data will not be  
856 stored on participants' mobile phones. The REDCap system, a HIPAA compliant, secure system will be utilized to  
857 collect and manage all EMA data and EMA data will not contain any identifying information. In addition, we will  
858 obtain a Certificate of Confidentiality (COC) from the National Institutes of Health (NIH) that protects study data  
859 from forced disclosure. NIH automatically issues a COC for all NIH funded research.

860

#### 861 ***I. Research Team Access to Subject Data***

862

863 Study investigators and the research staff will have access to all data stored on stored in Qualtrics, REDCap, and  
864 Box. All of these programs are HIPAA compliant and secure programs that allow storage and management of data  
865 that will be accessible only to study investigators and research staff at Rutgers and Utah. All study data will be  
866 anonymous and will contain no personal identifiers. Audio or video files will not have participants' names on them  
867 and will be shared only among Utah and Rutgers research investigators and staff using Office 365 OneDrive or Box,  
868 HIPAA compliant, secure systems.

869

#### 870 **4.10 Secondary Data – Records/Chart Reviews/Databases/Tissue Banks/etc.**

871

872 N/A

873

#### 874 **4.11 Chart/Record Review Selection**

875

876 N/A

877

#### 878 **4.12 Secondary Specimen Collection**

879

880 N/A

881

### 882 **5.0 Special Considerations**

883

884

#### 885 **5.1 Health Insurance Portability and Accountability Act (HIPAA)**

886

887 We will be obtaining individually identifiable health Information associated with a HIPAA-covered component or  
888 entity in the course of the research.

889

#### 890 **5.2 Family Educational Rights and Privacy Act (FERPA)**

891

892 N/A

893

#### 894 **5.3 NJ Access to Medical Research Act**

895

896 N/A

897

#### 898 **5.4 Code of Federal Regulations Title 45 Part 46 (Vulnerable Populations)**

899

#### 900 **A. "Special" Classes Of Subjects**

901  
902 N/A

## 903 6.0 Research Data Protection and Reporting

### 905 6.1 Data Management and Confidentiality

906  
907 **A. Data Analyses.** Analyses will be conducted on an intent-to-treat basis. We will first examine baseline between-  
908 group differences on demographic and other key variables - those that show a difference of  $p < .10$  will be entered  
909 as covariates in the analyses below. Given that this RCT occurs within a naturalistic treatment context (i.e. MT  
910 programs in which study participants will also be receiving usual care), group differences in usual treatment (e.g.,  
911 methadone dose or number of TAU psychotherapy sessions) will be treated as covariates. To handle **missing data**,  
912 we will conduct a series of sensitivity analyses using pattern-mixture (PM) approaches,<sup>15-17</sup> assuming missing-at-  
913 random (MAR),<sup>18</sup> not-missing-at-random (nMAR) and/or a mix of nMAR and MAR, to assess plausible treatment  
914 effects in the presence of missing data. Other PM approaches such as control-based pattern imputation approach  
915 or the tipping-point approach will also be considered.<sup>19</sup> The missing data handling strategy will be carefully  
916 selected depending on the distributions, type, and mechanism of missing data (informative vs. non-informative).

#### 918 **Analyses.**

919  
920 **Hypothesis 1. (Primary Outcome)** MORE will result in less risk of relapse and methadone treatment drop-out. We  
921 will use survival analysis (Kaplan Meier curves and marginal model analysis for multivariate survival data)<sup>20</sup> to test  
922 effects of MORE vs. TAU on time until first lapse evidenced either on EMA, Addiction Severity Index, drug screen,  
923 or medical records (whichever is first) and clinic report of date for treatment drop-out. Survival analysis will be run  
924 once, at 16 weeks post-baseline. We will estimate the hazard ratios of drug use and treatment drop-out when  
925 comparing MORE with TAU, controlling for covariates.

926  
927 **Hypotheses 2.1 and 2.2 (Secondary Outcomes)**. MORE will result in more days of opioid and other drug abstinence  
928 (or less days of use) than TAU. Generalized linear mixed model (GLMM)<sup>21</sup> repeated measures analysis will be used.  
929 Days of use/abstinence will be assessed via EMA, and number of drug use days in the past 30 days at follow-up. In  
930 cases of conflicting findings across data sources, we will assume the highest number of days of use or lowest  
931 number of abstinent days recorded for that period. Analyses will include group (MORE vs. TAU), time, and group by  
932 time interactions as the fixed effects independent variables. Potential confounders that meet the  $p < 0.10$  criterion  
933 stated above will be entered as covariates. Linear contrasts will be constructed to test between-group differences  
934 in “days of use” or “days of abstinence” separately at each timepoint. In comparing days of use, if a substantial  
935 proportion of subjects do not use drugs, resulting in excessive zero days of use, we will use a two-part  
936 logistic/linear analysis model.<sup>22,23</sup>

937  
938 **Hypotheses 2.3 (Secondary Outcomes)**. MORE will result in greater MT adherence and greater decreases in pain  
939 severity, depression, and anxiety over time than TAU. We will use chi-square and logistic regression to compare  
940 methadone adherence and GLMM to compare pain, depression, and anxiety between the treatment groups, using  
941 the same analytic strategy described above.<sup>21</sup>

#### 942 943 **B. Power Analysis**

944  
945 We powered the R33 study based on data from prior research. We used a study of an mindfulness-based  
946 intervention for substance users,<sup>4</sup> which showed that the hazard ratio of relapse to drug use for the intervention  
947 compared to TAU was 0.46. We thus assumed a similar, but more conservative hazard ratio of relapse to drug use  
948 of MORE compared to TAU at about 0.55. (We are using a slightly more conservative hazard ratio than in the

949 original application due to the increased power obtained by reducing the number of treatment conditions from  
950 three to two.) We also assumed that the median relapse time to drug use is 99 days, based on a prior study of  
951 relapse to drug use in a general MT population.<sup>5</sup> With 1.5 years of subject accrual and an additional follow-up of 16  
952 weeks after the accrual interval, our study needs 47 subjects per group to test a hazard ratio of 0.55 when  
953 comparing MORE to TAU, with 80% power and alpha=5% (two-sided). To account for attrition, we will recruit up to  
954 85 subjects per group (a total of up to 184 subjects at a 1:1 ratio for MORE vs. TAU).

#### 955 **C. Data Security**

956 All investigators and research staff will have undergone mandatory education in human research participant  
957 protection. To assure confidentiality, data will be secured in a database management system, password protected  
958 files, and in secure file cabinets. Data collection forms, databases, and recordings will not include identifiers other  
959 than a study ID code. The key to the code will be kept separately in a locked and/or password protected file for no  
960 longer than six years. Informed consent forms will be kept separately in a locked file in the same office. Three  
961 levels of security are provided to prevent unauthorized persons from accessing the data: password protection,  
962 computer or file cabinet locks, and a locked office. In addition, we have a Certificate of Confidentiality from the  
963 National Institutes of Health that protects study data from subpoena. Access to data will be limited study  
964 investigators and staff. Research data will be kept no longer than 10 years.

#### 965 **D. Data Quality Control**

966 As we have done in prior studies, protocols will be developed during the initial start-up period that explicitly  
967 describes the specific procedures related to data collection, entry, storage, and quality assurance for both study  
968 conditions. Data will be collected by research staff in strict accordance with the study's protocols. All data collected  
969 will be independently reviewed for quality and consistency by a member of the research team who was not  
970 responsible for collecting the source data. The research staff will be trained to avoid omissions in data collection  
971 and data entry. Computer entry protocols will be programmed to avoid accidental skipping of question items. We  
972 will apply conditional formatting to datasheets to remove the possibility of out of range data. Data will be entered  
973 directly into a secure Qualtrics or REDCap databases. If problems are noted in data entry (e.g., out of range values,  
974 missing values), the Research Assistant, Study Coordinator, and Dr. Cooperman will investigate the root cause, and  
975 solutions to rectify the problem will be generated and implemented.

#### 976 **6.2 Data Security**

977 As noted above, to assure confidentiality, anonymous data and recordings of group sessions will be secured in a  
978 database management system, password protected files, and in secure file cabinets. Data collection forms,  
979 databases, and recordings will not include identifiers other than a study ID code. We will include all three levels of  
980 security: password protection, computer or file cabinet locks, and a locked office. Participants' encrypted cognitive  
981 task data will be housed on a secure server "using Secure Sockets Layer (SSL), the same technology used by online  
982 shopping and banking web sites to protect sensitive information transmitted over the web"

#### 983 **6.3 Data and Safety Monitoring**

##### 984 **A. Periodic Data Evaluation**

985 The Data and Safety Monitoring Board (DSMB) will meet every 6 months to monitor and evaluate the safety of  
986 participants throughout the course of the research study. The DSMB will:

- 996 • Assess the performance of the study with respect to participant recruitment, retention and follow-up,  
997 protocol adherence, and data quality and completeness.
- 998 • Monitor interim data regarding the safety of the study regimes.
- 999 • Review and consider any protocol modifications or ancillary studies proposed by study investigators after the  
1000 main trial begins to ensure that these do not negatively impact on the main trial.
- 1001 • Advise the Institutional Review Board as to whether the protocol should continue as scheduled or undergo a  
1002 modification due to a finding from the monitoring process.

1003  
1004 **B. Type of Data Evaluated**  
1005

1006 The study investigators and the DSMB will be responsible for data safety and monitoring. The DSMB and the  
1007 investigators will monitor the cumulative safety data during the period when participants are in the study. They  
1008 will: 1) assess the performance of the study with respect to participant recruitment, retention and follow-up,  
1009 protocol adherence, and data quality and completeness, to help ensure the likelihood of successful and timely trial  
1010 completion; 2) monitor interim data regarding the safety of the study regimens; 3) review and consider any  
1011 protocol modifications by the study investigators after the trial begins to ensure that these do not negatively  
1012 impact on the study; and 4) advise the Institutional Review Board and NIH as to whether the protocol should  
1013 continue as scheduled or undergo a modification due to a finding from the monitoring process.

1014  
1015 **C. Collection of Safety Information**  
1016

1017 Safety information will be collected during participant’s assessments, telephone calls with participants,  
1018 conversations with clinic staff, and MORE group sessions.

1019  
1020 **D. Frequency of Data Collection**  
1021

1022 Safety data collection will begin with collection of the first baseline assessment and continue through the end of  
1023 the follow-up data collection period (about 2-years total). In addition to using assessment data to monitor safety,  
1024 study clinicians will record any adverse events that they become aware of during MORE group sessions and study  
1025 Investigators will ask NBCC, JSAS, and the Lennard Clinic personnel, with participant consent, to notify the research  
1026 team should they become aware that any study participant has been hospitalized or experienced any other  
1027 adverse event. Such notifications will be requested throughout the study period. All adverse events will be  
1028 recorded on spreadsheets and will include details of the adverse event and whether or not it was study-related.  
1029 Numbers and types of events and other quantifiable event details will be entered into a database for analysis.

1030  
1031 **E. Reviewer of Data**  
1032

1033 The DSMB will meet every six months to monitor the cumulative safety data during the period when participants  
1034 are in the study. The DSMB will monitor the study according to the guidelines specified in the study protocol and  
1035 the operating procedures established at the initial DSMB meeting, unless the DSMB determines during the course  
1036 of the trial that modification of the guidelines is in the best interest of the study and its participants. Such a  
1037 decision may be based on new information that emerges during the course of the study (e.g., publication of the  
1038 results of a similar study), realization of inappropriate initial study assumptions, or the occurrence of an  
1039 unanticipated scenario. Considering the minimal risk nature of the intervention, we do not anticipate any serious  
1040 adverse events that could trigger the immediate suspension of the research. However, the Investigators and the  
1041 DSMB will monitor and evaluate the safety of participants throughout the course of the research study. The  
1042 Independent Monitors will advise the Investigators and IRB as to whether the protocol should continue as  
1043 scheduled, undergo a modification, or halt study activities due to a finding from the monitoring process. An interim



1044 analysis of the data may be conducted when 50% of the sample is accrued. If the results show statistically  
1045 overwhelming significant differences between groups, the DSMB will consider the clinical meaning of the results  
1046 and determine whether the study should be stopped.

1047

1048 **F. Schedule of Review of Cumulative Data**

1049

1050 Under supervision of the investigators, a Research Assistant or the Study Coordinator will conduct monthly  
1051 descriptive summaries on all data to ensure their accuracy. This will not involve completing any statistical  
1052 comparisons. If problems are noted in data entry (e.g., out of range values, missing values), the Research Assistant  
1053 and the investigators will investigate the root cause, and solutions to rectify the problem.

1054

1055 **G. Tests for Safety Data**

1056

1057 Basic statistical tests, including frequency distributions, Anovas and t-tests, will be carried out, if necessary, to  
1058 compare the control and intervention groups on numbers and types of adverse events within specific time frames  
1059 in order to insure the safety of the intervention.

1060

1061 **H. Suspension of Research**

1062

1063 Considering the minimal risk nature of the intervention, we do not anticipate any serious adverse events that could  
1064 trigger the immediate suspension of the research.

1065

1066 **6.4 Reporting Results**

1067

1068 **A. Sharing of Results with Subjects**

1069

1070 Participants will be provided with the study PI's name and contact information along with an estimate of when the  
1071 study results will be available. Participants may contact the PI should they be interested in obtaining results of the  
1072 study.

1073

1074 **B. Individual Results**

1075

1076 N/A

1077

1078 **C. Aggregate Results**

1079

1080 As noted above, subjects will be given the PI's name and contact information and encouraged to follow-up with  
1081 the PI should they be interested in obtaining results of the study.

1082

1083 **D. Professional Reporting**

1084

1085 Study results will be described in reports to the funding agency and published in peer-reviewed journals. Findings  
1086 may also be presented at professional meetings.

1087

1088 **6.5 Data Sharing**

1089

1090 Analyses of data generated from this project will be shared with the scientific community through publications in  
1091 peer-reviewed journals and presentations at scientific meetings. Because we will be following study participants,

1092 we will be collecting identifying information. Even though the final dataset will be stripped of identifiers prior to  
1093 release for sharing, we believe that there remains the possibility of deductive disclosure of participants with  
1094 unusual characteristics. Thus, we will make the data and associated documentation available to research  
1095 community scientists under a data-sharing agreement that provides for: 1) a commitment to using the data only  
1096 for research purposes and not to identify any individual participant; 2) a commitment to securing the data using  
1097 appropriate computer technology; and 3) a commitment to destroying or returning the data after analyses are  
1098 completed. The study will be registered with clinicaltrials.gov  
1099

## 1100 7.0 Data and/or Specimen Banking

1101 N/A  
1102  
1103

## 1104 8.0 Other Approvals/Authorizations

1105 N/A  
1106  
1107

## 1108 9.0 Bibliography

- 1109  
1110 1. Bao YP, Liu ZM, Epstein DH, Du C, Shi J, Lu L. A meta-analysis of retention in methadone maintenance by dose  
1111 and dosing strategy. *Am J Drug Alcohol Abuse*. 2009;35(1):28-33. doi:10.1080/00952990802342899  
1112 2. Naji L, Dennis BB, Bawor M, et al. A prospective study to investigate predictors of relapse among patients with  
1113 opioid use disorder treated with methadone. *Substance abuse: research and treatment*. 2016;10:9.  
1114 3. Eyler EC. Chronic and acute pain and pain management for patients in methadone maintenance treatment. *The*  
1115 *American journal on addictions*. 2013;22(1):75-83.  
1116 4. Brewer DD, Catalano RF, Haggerty K, Gainey RR, Fleming CB. RESEARCH REPORT A meta-analysis of predictors of  
1117 continued drug use during and after treatment for opiate addiction. *Addiction*. 1998;93(1):73-92.  
1118 5. Mancino M, Curran G, Han X, Allee E, Humphreys K, Booth BM. Predictors of attrition from a national sample of  
1119 methadone maintenance patients. *The American journal of drug and alcohol abuse*. 2010;36(3):155-160.  
1120 6. Garland EL. *Mindfulness-Oriented Recovery Enhancement for Addiction, Stress, and Pain*. NASW Press; 2013.  
1121 7. Cleeland C. *Brief Pain Inventory-Short Form (BPI-SF)*. 1994.  
1122 8. Folstein MF, Folstein SE, McHugh PR. "Mini-mental state". A practical method for grading the cognitive state of  
1123 patients for the clinician. *J Psychiatr Res*. Nov 1975;12(3):189-98.  
1124 9. First M, Williams J, Karg R, Spitzer R. *Structured Clinical Interview for DSM-5—Research Version (SCID-5 for DSM-*  
1125 *5, Research Version; SCID-5-RV)*. American Psychiatric Association; 2015.  
1126 10. Schnurr P, Vielhauer M, Weathers F, Findler M. The Brief Trauma Questionnaire (BTQ) [Measurement  
1127 instrument]. 1999;  
1128 11. Schnurr PP, Spiro AI, Vielhauer MJ, Findler MN, Hamblen JL. Trauma in the lives of older men: Findings from the  
1129 Normative Aging Study. *Journal of Clinical Geropsychology*. 2002;8:175-187.  
1130 12. Brown TA, Chorpita BF, Korotitsch W, Barlow DH. Psychometric properties of the Depression Anxiety Stress  
1131 Scales (DASS) in clinical samples. *Behav Res Ther*. Jan 1997;35(1):79-89.  
1132 13. Brazier JE, Harper R, Jones NM, et al. Validating the SF-36 health survey questionnaire: new outcome measure  
1133 for primary care. *BMJ*. Jul 18 1992;305(6846):160-4.  
1134 14. Holm S. A simple sequentially rejective multiple test procedure *Scandinavian Journal of Statistics*. 1979;6(2):65-  
1135 70.  
1136 15. Siddique J, Harel O, Crespi CM. Addressing missing data mechanism uncertainty using multiple-model multiple  
1137 imputation: application to a longitudinal clinical trial. *The annals of applied statistics*. 2012;6(4):1814.

1138 16. Siddique J, Harel O, Crespi CM, Hedeker D. Binary variable multiple-model multiple imputation to address  
1139 missing data mechanism uncertainty: application to a smoking cessation trial. *Statistics in medicine*.  
1140 2014;33(17):3013-3028.  
1141 17. Hedeker D, Mermelstein RJ, Demirtas H. Analysis of binary outcomes with missing data: missing= smoking, last  
1142 observation carried forward, and a little multiple imputation. *Addiction*. 2007;102(10):1564-1573.  
1143 18. Little RJ, Rubin DB. *Statistical analysis with missing data*. John Wiley & Sons; 2014.  
1144 19. Carpenter J, Kenward M. *Multiple imputation and its application*. John Wiley & Sons; 2012.  
1145 20. Spiekerman CF, Lin DY. Marginal regression models for multivariate failure time data. *Journal of the American*  
1146 *Statistical Association* 1998;93(443):1164-1175.  
1147 21. Fitzmaurice GM, Laird NM, Ware JH. *Applied longitudinal analysis*. vol 998. John Wiley & Sons; 2012.  
1148 22. Lachenbruch PA. Comparisons of two-part models with competitors. *Statistics in medicine*. 2001;20(8):1215-  
1149 1234.  
1150 23. Lu SE, Lin Y, Shih WCJ. Analyzing excessive no changes in clinical trials with clustered data. *Biometrics*.  
1151 2004;60(1):257-267.  
1152
