# Supplementary material
Source: PubMed Central journal article supplement (PMC10704342)
Supplement: jamapsychiatry-e235138-s003.pdf [file jamapsychiatry-e235138-s003.pdf]

## Data Sharing Statement

Cooperman. Telehealth Mindfulness-Oriented Recovery Enhancement vs Usual Care in Individuals With Opioid Use Disorder and Pain. *JAMA Psychiatry*. Published December 07, 2023. doi:10.1001/jamapsychiatry.2023.5138

### Data

**Data available:** Yes

**Data types:** Deidentified participant data

**How to access data:** [cooperna@rwjms.rutgers.edu](mailto:cooperna@rwjms.rutgers.edu)

**When available:** With publication

### Supporting Documents

**Document types:** Statistical/analytic code, Informed consent form

**How to access documents:** [cooperna@rwjms.rutgers.edu](mailto:cooperna@rwjms.rutgers.edu)

**When available:** With publication

### Additional Information

**Who can access the data:** Data will be made available to researchers whose proposed use of the data has been approved

**Types of analyses:** Data will be made available for any purpose.

**Mechanisms of data availability:** Data will be available to researchers with a signed data access agreement.
